# Supplementary material for: Suitability of the RIPLS and IEPS for Discriminating Attitude Differences towards Interprofessional Education among Students of Healthcare Profession
Source: Hindawi journal article supplement (doi:10.1155/2016/5946154), 2016-01-01
Supplement: f1 [file 5946154.f1.docx]

| **The Readiness for Interprofessional Learning Scale (RIPLS)**  **Please indicate your level of agreement with each of the following statements** | | | | | | |
| --- | --- | --- | --- | --- | --- | --- |
| **S.No** | **Item** | **Stronglyagree** | **Agree** | **Undecided** | **Disagree** | **Stronglydisagree** |
| **1.** | Learningwithotherstudentswillmakemeamoreeffectivememberofahealthcareteam | 🞏 | 🞏 | 🞏 | 🞏 | 🞏 |
| **2.** | Patientswouldultimatelybenefitifhealthcarestudentsworkedtogether | 🞏 | 🞏 | 🞏 | 🞏 | 🞏 |
| **3.** | Sharedlearningwithotherhealthcarestudentswillincreasemyabilitytounderstandclinicalproblems | 🞏 | 🞏 | 🞏 | 🞏 | 🞏 |
| **4.** | Communicationskillsshouldbelearnedwithotherhealthcarestudents | 🞏 | 🞏 | 🞏 | 🞏 | 🞏 |
| **5.** | Team-workingskillsarevitalforallhealthcarestudentstolearn | 🞏 | 🞏 | 🞏 | 🞏 | 🞏 |
| **6.** | Sharedlearningwillhelpmetounderstandmyownprofessionallimitations | 🞏 | 🞏 | 🞏 | 🞏 | 🞏 |
| **7.** | Learningbetweenhealthcarestudentsbeforequalificationwouldimproveworkingrelationshipsafterqualification | 🞏 | 🞏 | 🞏 | 🞏 | 🞏 |
| **8.** | Sharedlearningwillhelpmethinkpositivelyaboutotherhealthcareprofessionals | 🞏 | 🞏 | 🞏 | 🞏 | 🞏 |
| **9.** | Forsmall-grouplearningtowork,studentsneedtorespectandtrusteachother | 🞏 | 🞏 | 🞏 | 🞏 | 🞏 |
| **10.** | Idon'twanttowastetimelearningwithotherhealthcarestudents | 🞏 | 🞏 | 🞏 | 🞏 | 🞏 |
| **11.** | Itisnotnecessaryforundergraduatehealthcarestudentstolearntogether | 🞏 | 🞏 | 🞏 | 🞏 | 🞏 |
| **12.** | Clinicalproblemsolvingcanonlybelearnteffectivelywithstudentsfrommyownschool | 🞏 | 🞏 | 🞏 | 🞏 | 🞏 |
| **13.** | Sharedlearningwithotherhealthcareprofessionalswillhelpmetocommunicatebetterwithpatientsandotherprofessionals | 🞏 | 🞏 | 🞏 | 🞏 | 🞏 |
| **14.** | Iwouldwelcometheopportunitytoworkonsmallgroupprojectswithotherhealthcarestudents | 🞏 | 🞏 | 🞏 | 🞏 | 🞏 |
| **15.** | Thefunctionofnursesandalliedhealthcareworkersismainlytoprovidesupportfordoctors | 🞏 | 🞏 | 🞏 | 🞏 | 🞏 |
| **16.** | Sharedlearningwillhelpmeclarifythenatureofpatients'orclients'problems | 🞏 | 🞏 | 🞏 | 🞏 | 🞏 |
| **17.** | Sharedlearningbeforequalificationwillhelpmebecomeabetterteamworker | 🞏 | 🞏 | 🞏 | 🞏 | 🞏 |
| **18.** | Iamnotsurewhatmyprofessionalrolewillbe | 🞏 | 🞏 | 🞏 | 🞏 | 🞏 |
| **19.** | Ihavetoacquiremuchmoreknowledgeandskillthanotherstudentsinmyownfaculty | 🞏 | 🞏 | 🞏 | 🞏 | 🞏 |
| **The Interdisciplinary Education Perception Scale (IEPS)**  **Please indicate your level of agreement with each of the following statements** | | | | | | |
| **S.No** | **Item** | **Stronglyagree** | **Agree** | **Undecided** | **Disagree** | **Stronglydisagree** |
| **1.** | Individuals in my profession are well-trained | 🞏 | 🞏 | 🞏 | 🞏 | 🞏 |
| **2.** | Individuals in my profession are able to work closely with individuals in other professions | 🞏 | 🞏 | 🞏 | 🞏 | 🞏 |
| **3.** | Individuals in my profession are very positive about their goals and objectives | 🞏 | 🞏 | 🞏 | 🞏 | 🞏 |
| **4.** | Individuals in my profession need to cooperate with other professions | 🞏 | 🞏 | 🞏 | 🞏 | 🞏 |
| **5.** | Individuals in my profession are very positive about their contributions and accomplishments | 🞏 | 🞏 | 🞏 | 🞏 | 🞏 |
| **6.** | Individuals in my profession must depend upon the work of people in other professions | 🞏 | 🞏 | 🞏 | 🞏 | 🞏 |
| **7.** | Individuals in my profession trust each other's professional judgment | 🞏 | 🞏 | 🞏 | 🞏 | 🞏 |
| **8.** | Individuals in my profession are extremely competent | 🞏 | 🞏 | 🞏 | 🞏 | 🞏 |
| **9.** | Individuals in my profession are willing to share information and resources with other professionals | 🞏 | 🞏 | 🞏 | 🞏 | 🞏 |
| **10.** | Individuals in my profession have good relations with people in other professions | 🞏 | 🞏 | 🞏 | 🞏 | 🞏 |
| **11.** | Individuals in my profession think highly of other related professions | 🞏 | 🞏 | 🞏 | 🞏 | 🞏 |
| **12.** | Individuals in my profession work well with each other | 🞏 | 🞏 | 🞏 | 🞏 | 🞏 |
